# Supplementary material for: Association of Maternal Erythrocyte PUFA during Pregnancy with Offspring Allergy in the Chinese Population
Source: MDPI journal article supplement (doi:10.3390/nu14112312), 2022-05-31
Supplement: s1 [file s1]

**Table S1.** The associations between maternal erythrocyte fatty acids and offspring specific allergic diseases within 2 years old.

| Erythrocyte fatty acids | Specific allergic diseases [HR (95% CI)] |                     |                          |                             |
|-------------------------|------------------------------------------|---------------------|--------------------------|-----------------------------|
|                         | Eczema<br>(n=181)                        | Urticaria<br>(n=33) | Food Allergy<br>(n=57)   | Allergic Rhinitis<br>(n=22) |
| PUFA                    | <b>0.81 (0.67, 0.98)</b>                 | 0.92 (0.60, 1.40)   | 0.82 (0.60, 1.12)        | 0.91 (0.51, 1.61)           |
| n-6-PUFA                | 0.90 (0.75, 1.08)                        | 0.88 (0.60, 1.31)   | 0.87 (0.64, 1.17)        | 1.03 (0.58, 1.83)           |
| AA                      | 0.83 (0.66, 1.04)                        | 0.84 (0.50, 1.38)   | <b>0.65 (0.44, 0.96)</b> | 0.94 (0.46, 1.95)           |
| LA                      | 1.02 (0.82, 1.26)                        | 0.96 (0.59, 1.55)   | 1.22 (0.84, 1.78)        | 1.25 (0.65, 2.41)           |
| GLA                     | 1.03 (0.95, 1.12)                        | 0.99 (0.78, 1.25)   | 1.08 (0.97, 1.20)        | 0.99 (0.78, 1.25)           |
| DGLA                    | 0.85 (0.68, 1.05)                        | 1.05 (0.65, 1.69)   | 0.85 (0.58, 1.22)        | 0.97 (0.52, 1.80)           |
| n-3-PUFA                | <b>0.77 (0.60, 0.99)</b>                 | 1.10 (0.62, 1.94)   | 0.82 (0.51, 1.33)        | 0.70 (0.30, 1.62)           |
| ALA                     | 1.01 (0.97, 1.05)                        | 1.01 (0.92, 1.12)   | 1.00 (0.93, 1.08)        | 0.96 (0.80, 1.15)           |
| EPA                     | 0.82 (0.64, 1.06)                        | 1.17 (0.69, 1.99)   | 1.17 (0.77, 1.76)        | 1.77 (0.90, 3.45)           |
| DHA                     | 0.80 (0.63, 1.03)                        | 0.88 (0.51, 1.52)   | 0.80 (0.52, 1.24)        | 1.20 (0.56, 2.57)           |
| DPA                     | 1.01 (0.88, 1.15)                        | 0.92 (0.68, 1.24)   | 0.87 (0.70, 1.08)        | 0.95 (0.65, 1.38)           |
| Omega-3 Index           | 0.80 (0.63, 1.01)                        | 0.92 (0.55, 1.54)   | 0.84 (0.55, 1.28)        | 1.32 (0.64, 2.70)           |
| n-6/n-3                 | 1.11 (0.91, 1.36)                        | 0.93 (0.56, 1.54)   | 1.18 (0.83, 1.69)        | 0.91 (0.47, 1.77)           |
| AA/EPA                  | 1.06 (0.83, 1.36)                        | 0.94 (0.52, 1.67)   | 0.85 (0.54, 1.34)        | 0.72 (0.33, 1.57)           |

NOTE: Statistically significant results are in bold ( $P < 0.05$ ).

The results in the table are the HR value and 95%CI corresponding to original value/IQR in erythrocyte fatty acid.

MODEL: Adjusted for maternal age, maternal BMI, educational level, occupation, monthly household income, gender of infant, breastfeeding duration, mother's allergy history, complementary feeding time, maternal passive smoking and maternal alcohol consumption.
